# Supplementary material for: Insoluble small-molecule organic cathodes for highly efficient pure-organic Li-ion batteries
Source: Royal Society of Chemistry journal article supplement (doi:10.1039/d1gc01927a), 2021-01-01
Supplement: d1gc01927a1.pdf [file d1gc01927a1.pdf]

## Supporting Information

# Insoluble Small-Molecule Organic Cathodes for Highly Efficient Pure Organic Li-Ion Batteries

Xinxin Wang<sup>a</sup>, Wu Tang<sup>a</sup>, Yang Hu<sup>a</sup>, Wenqiang Liu<sup>a</sup>, Yichao Yan<sup>b</sup>, Liang Xu<sup>c</sup> and  
Cong Fan<sup>\*a</sup>

- a. School of Materials and Energy, University of Electronic Science and Technology of China (UESTC), Chengdu 611731, P. R. China
- b. State Key Laboratory of Electronic Thin Films and Integrated Devices, University of Electronic Science and Technology of China (UESTC), Chengdu 611731, P. R. China
- c. Department of Chemistry and Key Laboratory for Preparation and Application of Ordered Structural Materials of Guangdong Province, Shantou University, Shantou 515063, P. R. China

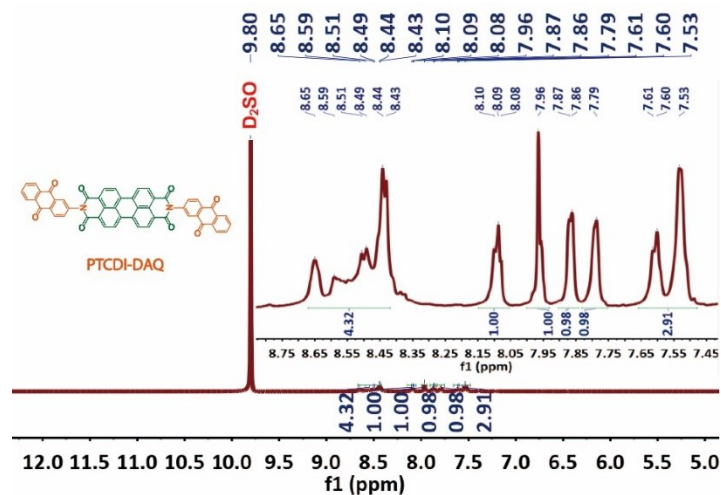

Figure S1.  $^1\text{H}$  NMR spectrum of PTCDI-DAQ.

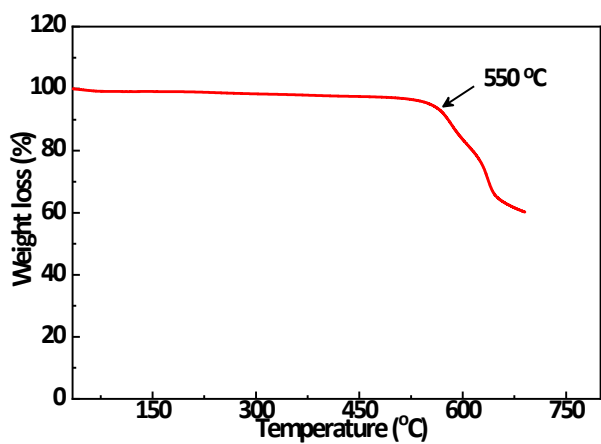

Figure S2. TGA analysis of PTCDI-DAQ.

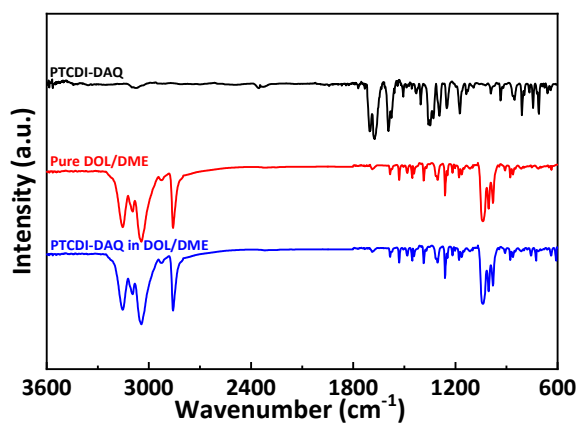

Figure S3. FT-IR spectroscopy of PTCDI-DAQ powder, pure DOL/DME and soaked DOL/DME (immersing PTCDI-DAQ powder into DOL/DME for 7 days), respectively.

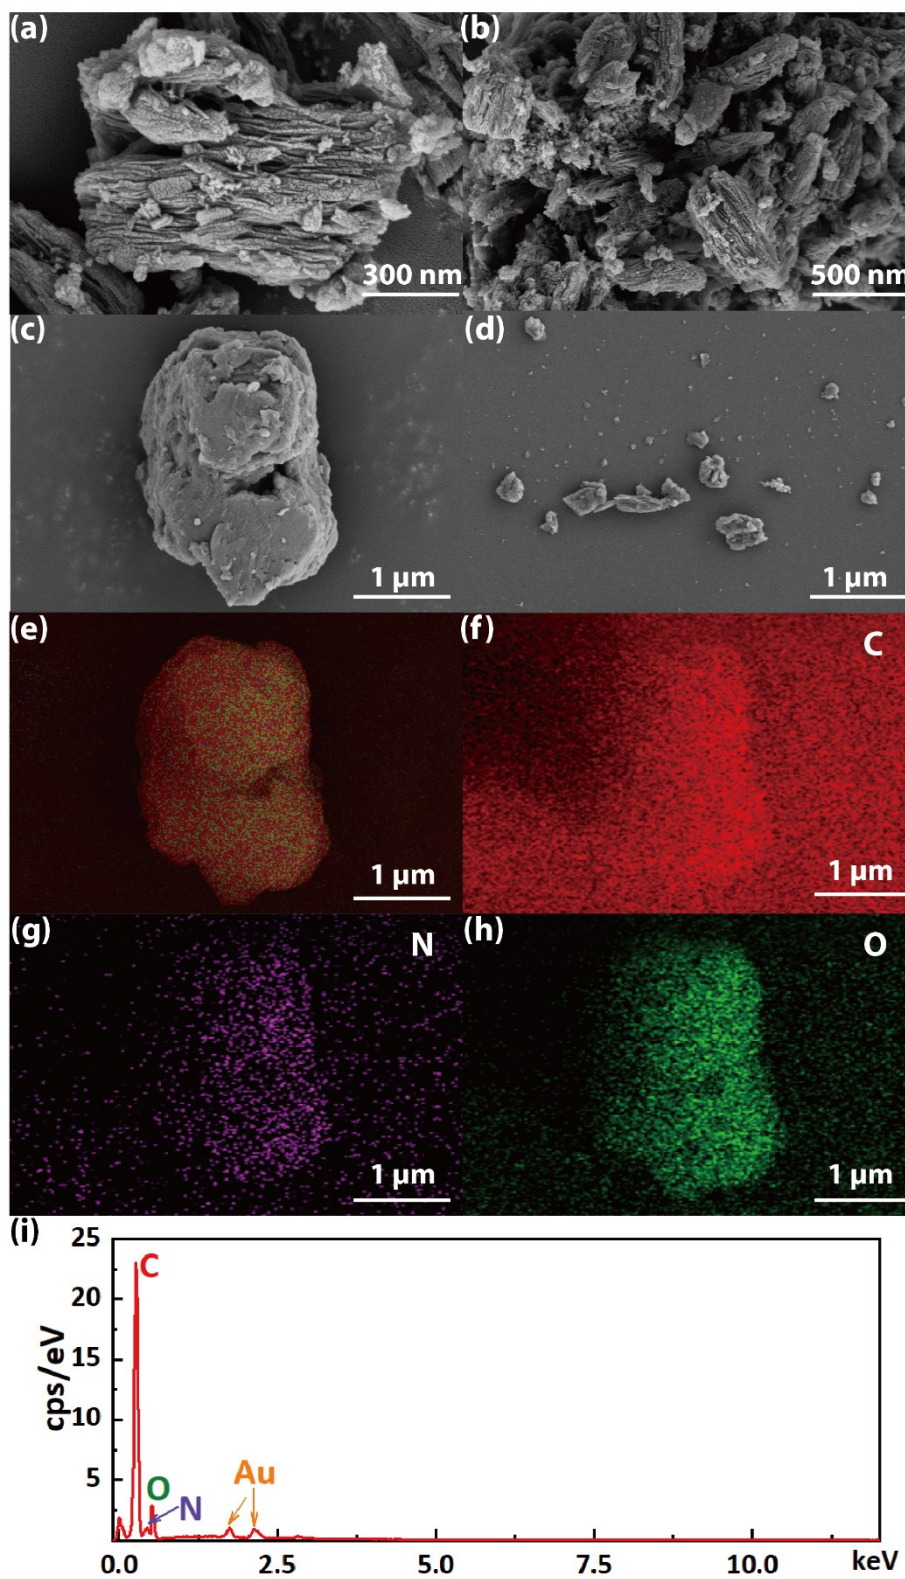

**Figure S4.** The (a-d) SEM images, (e-h) mapping and (i) energy dispersive spectrometer (EDS) images of C, N, O elements for pure PTCDI-DAQ.

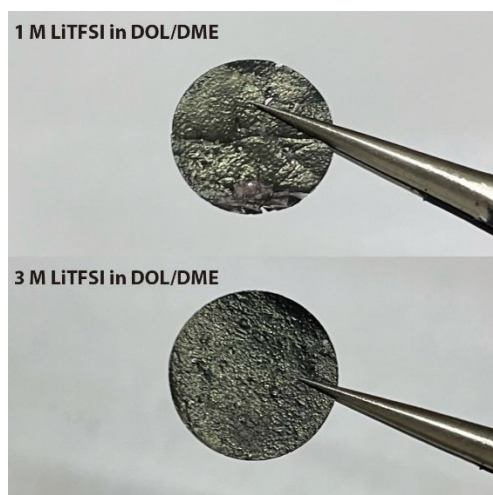

**Figure S5.** The image of electrodes after cycling for 1 month using 1M LiTFSI in DOL/DME and 3M LiTFSI in DOL/DME, respectively.

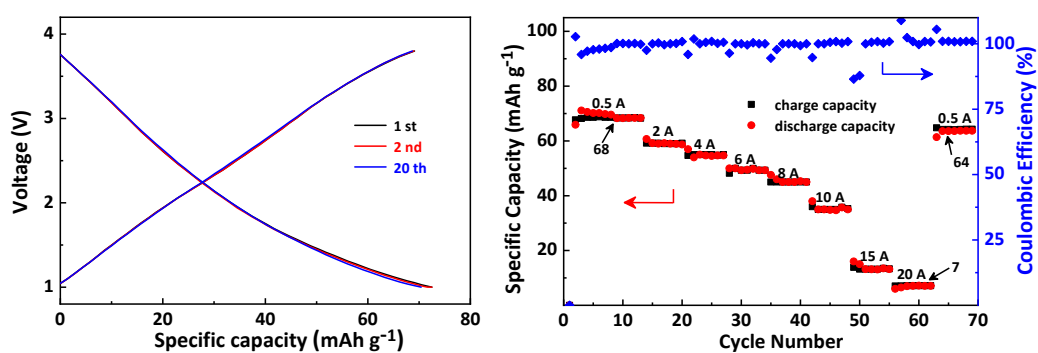

**Figure S6.** (a) The charge-discharge profile of KB/La133 (3:1) electrode; (b) The C-rate profile of KB/La133 (3:1) electrode.

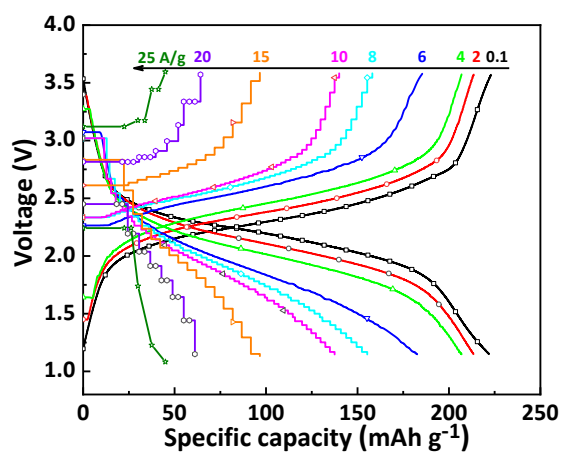

**Figure S7.** The charge-discharge curves of PTCDI-DAQ half cells at various current densities.

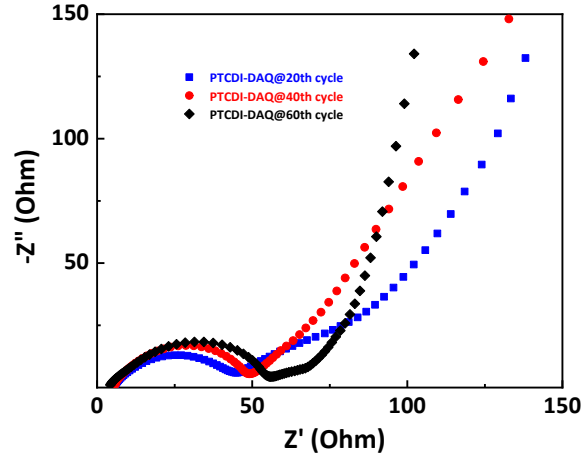

**Figure S8.** The EIS tests for PTCDI-DAQ cathodes after cycling.

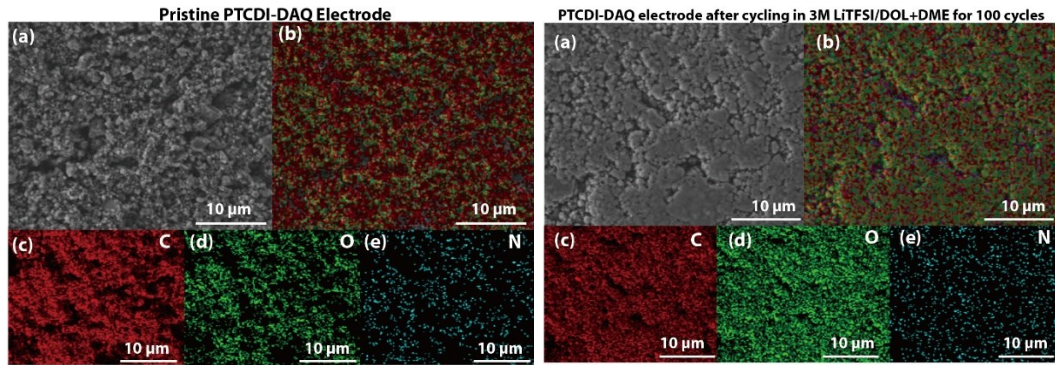

**Figure S9.** The (a) SEM image and (b-e) the mapping images of C, O, N elements for pristine and cycled PTCDI-DAQ electrodes.

**GITT test:** A constant current density of 0.5 C for 3 min and then relaxing for 30 min at open circuit (1 C corresponds to the current density of 200 mA g<sup>-1</sup>) was exploited. Afterwards, the Li-ion diffusion coefficients based on the GITT results were calculated using the following equation:

$$D_{Li^+} = \frac{4}{\pi} \left( \frac{n_m V_m}{S} \right)^2 \left( \frac{\Delta E_s}{\tau (dE_t/d\sqrt{\tau})} \right)^2 = \frac{4}{\pi} \left( \frac{V}{S} \right)^2 \left( \frac{\Delta E_s}{\tau (dE_t/d\sqrt{\tau})} \right)^2 \approx \frac{4}{\pi \tau} (L)^2 \left( \frac{\Delta E_s}{\Delta E_\tau} \right)^2$$

In this equation,  $n_m$  is the mole number of the active materials;  $V_m$  is the molar volume of active materials;  $S$  is the effective area of the electrode (1.13 cm<sup>2</sup>);  $\tau$  is the relaxation time (1800 s);  $L$  is the average thickness of PTCDI-DAQ electrode (58.66 μm);  $\Delta E_s$ ,

is the potential change between neighboring relaxation end time;  $\Delta E_{\tau}$  is the potential change caused by every constant current charge/discharge process.

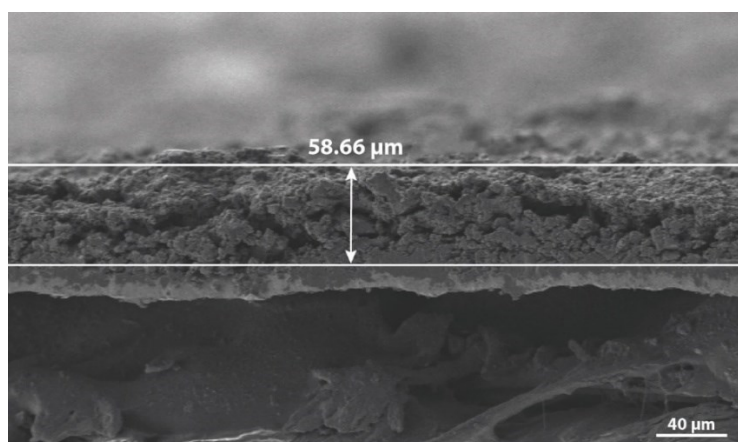

**Figure S10.** The thickness of PTCDI-DAQ electrode.

**Table S1.** Li-ion diffusion coefficient ( $D$ ) of the representative cathodes in LIBs reported to date.

| Cathode <sup>[a]</sup>                                                                                         | Technique <sup>[b]</sup> | $D_{Li^{+}}$ <sup>[c]</sup> | Ref.      |
|----------------------------------------------------------------------------------------------------------------|--------------------------|-----------------------------|-----------|
| PTCCDI-DAQ                                                                                                     | GITT                     | $1.21 \times 10^{-8}$       | This work |
| m-TP4OLi (O)                                                                                                   | GITT                     | $6.76 \times 10^{-8}$       | [S1]      |
| BP4OLi (O)                                                                                                     | GITT                     | $1.88 \times 10^{-8}$       | [S2]      |
| LiMn <sub>2</sub> O <sub>4</sub> (I)                                                                           | GITT                     | $2.5 \times 10^{-11}$       | [S3]      |
| Li <sub>1.12</sub> [Ni <sub>0.5</sub> Co <sub>0.2</sub> Mn <sub>0.3</sub> ] <sub>0.89</sub> O <sub>2</sub> (I) | GITT                     | $10^{-10}$ - $10^{-16}$     | [S4]      |
| LiNi <sub>0.6</sub> Co <sub>0.2</sub> Mn <sub>0.2</sub> O <sub>2</sub> (I)                                     | GITT                     | $2.78 \times 10^{-8}$       | [S5]      |
| Li(Ni <sub>1/3</sub> Co <sub>1/3</sub> Mn <sub>1/3</sub> )O <sub>2</sub> (I)                                   | GITT                     | $3.0 \times 10^{-10}$       | [S6]      |
| LiVO <sub>3</sub>                                                                                              | GITT                     | $10^{-8}$ - $10^{-9.5}$     | [S7]      |
| Li <sub>0.8</sub> CoO <sub>2</sub> (I)                                                                         | GITT                     | $6.4 \times 10^{-4}$        | [S8]      |
| LiNi <sub>3/8</sub> Co <sub>2/8</sub> Mn <sub>3/8</sub> O <sub>2</sub> (I)                                     | GITT                     | $10^{-12}$ - $10^{-16}$     | [S9]      |
| LiFePO <sub>4</sub> (I)                                                                                        | GITT                     | $1.8 \times 10^{-15}$       | [S10]     |

[a] O=organic electrode, I=inorganic electrode; [b] GITT=galvanostatic intermittent titration technique; [c]  $D_{Li^{+}}$ = Li-ion diffusion coefficient and the unit is  $cm^2 s^{-1}$ .

**Electrode kinetics:** The reaction kinetics of PTCDI-DAQ electrode were analyzing according to the following equations:

$$i = av^b \quad \text{Equation 1}$$

$$\log i = b \log v + \log a \quad \text{Equation 2}$$

In the above equations where  $i$  is the peak current of six redox peaks,  $v$  is the sweep rates,  $a$  and  $b$  are adjustable parameters. The  $b$  value could be acquired through the slope of linear fitting results in the log plot between peak current and scan rates. If  $b$  value is 0.5, the electrode is dominated by diffusion (battery behavior), whereas the process is capacity controlled (capacity behavior) when the  $b$  value is close to 1. Notably, when the  $b$  value exists between 0.5 and 1, the electrode kinetics are the hybridization of diffusion and capacitive behavior. The capacitive contribution can also be measured according to the equations below:

$$i = k_1 v + k_2 v^{\frac{1}{2}} \quad \text{Equation 3}$$

$$\frac{i}{v^{\frac{1}{2}}} = k_1 v^{\frac{1}{2}} + k_2 \quad \text{Equation 4}$$

$k_1$  and  $k_2$  are two variables, which were only related to the potential under the condition of negligible voltage polarization change between various scan rates.

According to the variable-scan CV results, in the reduction process, the  $b$  values of peak A was 0.769, which was between 0.5 and 1, meaning that the reduction of PTCDI-DAQ was diffusion and pseudocapacitance collectively controlled. Meanwhile, the  $b$  value of peak B corresponding to the oxidation process was 0.852. The result unveiled that redox procedure of PTCDI-DAQ was dominated by synergistic battery (low test currents) and pseudocapacitance (high test currents) behaviors.

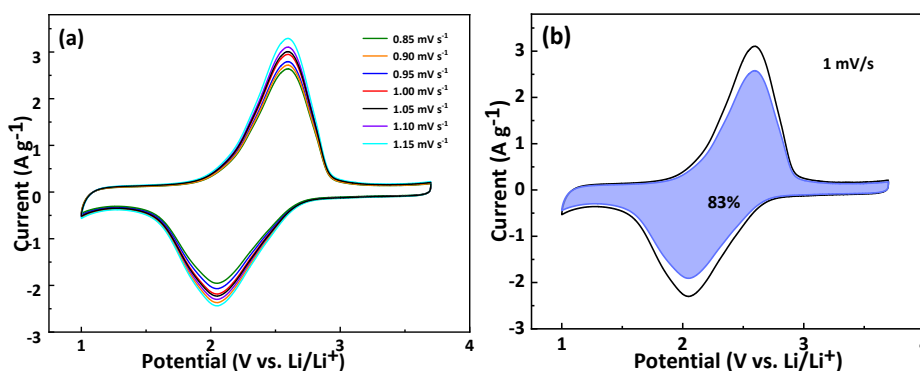

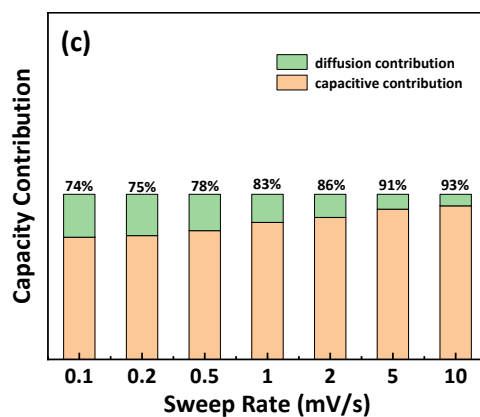

**Figure S11.** (a) The CV curves at the scan rates around 1 mV s<sup>-1</sup>; (b) The pseudocapacitance contribution at 1 mV s<sup>-1</sup> for PTCDI-DAQ; (c) The pseudocapacitance contribution at various scan rates.

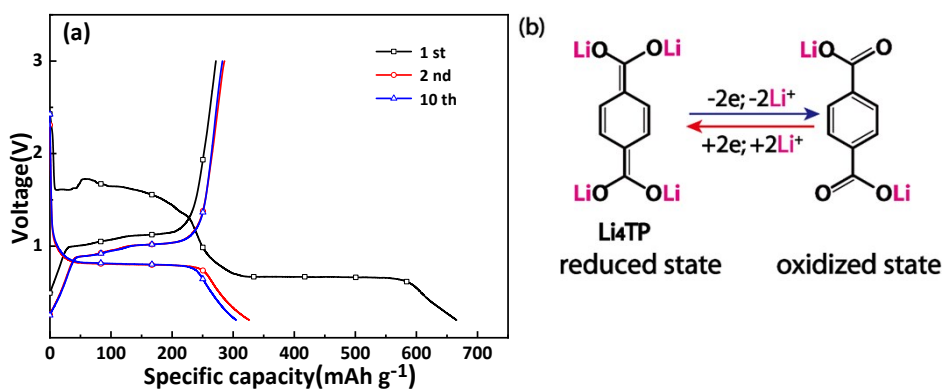

**Figure S12.** (a) The charge-discharge curves of H<sub>2</sub>TP (Li<sub>2</sub>TP) in Li-ion half cells; (b) The redox mechanism for Li<sub>2</sub>TP in half cells.

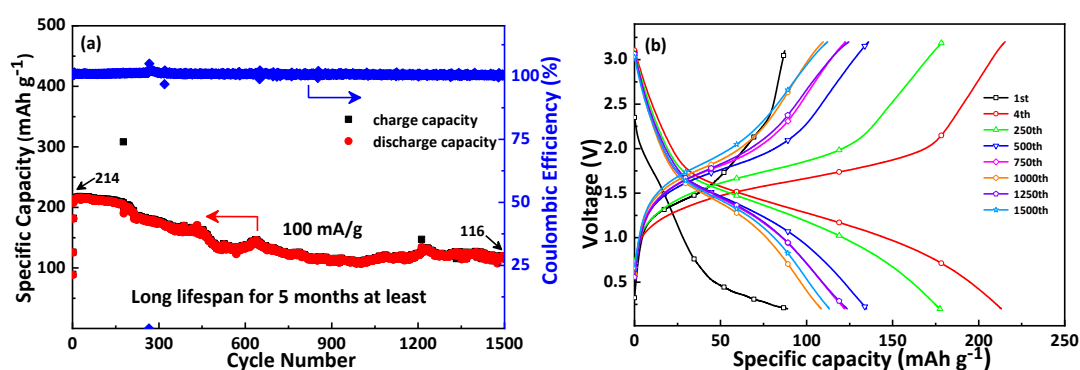

**Figure S13.** (a) The 1500-cycle profile and (b) The charge-discharge curves for the full cells at 100 mA g<sup>-1</sup>.



## References

1. Q. Yu, W. Tang, Y. Hu, J. Gao, M. Wang, S. Liu, H. Lai, L. Xu and C. Fan, *Chem. Eng. J.*, 2021, **415**, 128509-128517.
2. Q. Yu, Z. Yao, J. Shi, W. Tang, C. Wang, D. Li and C. Fan, *Org. Electron.*, 2020, **81**, 105661-105668.
3. J. Xie, K. Kohno, T. Matsumura, N. Imanishi, A. Hirano, Y. Takeda and O. Yamamoto, *Electrochim. Acta*, 2008, **54**, 376-381.
4. Y. Bai, X. Wang, X. Zhang, H. Shu, X. Yang, B. Hu, Q. Wei, H. Wu and Y. Song, *Electrochim. Acta*, 2013, **109**, 355-364.
5. A. Yaqub, Y.-J. Lee, M. J. Hwang, S. A. Pervez, U. Farooq, J.-H. Choi, D. Kim, H.-Y. Choi, S.-B. Cho and C.-H. Doh, *J. Mater. Sci.*, 2014, **49**, 7707-7714.
6. K. M. Shaju, G. V. S. Rao and B. V. R. Chowdari, *J. Electrochem. Soc.*, 2004, **151**, A1324-A1332.
7. X. M. Jian, J. P. Tu, Y. Q. Qiao, Y. Lu, X. L. Wang and C. D. Gu, *J. Power Sources*, 2013, **236**, 33-38.
8. J. Xie, N. Imanishi, T. Matsumura, A. Hirano, Y. Takeda and O. Yamamoto, *Solid State Ionics*, 2008, **179**, 362-370.
9. J. Li, X. He, R. Zhao, C. Wan, C. Jiang, D. Xia and S. Zhang, *J. Power Sources*, 2006, **158**, 524-528.
10. Y. Zhu, Y. Xu, Y. Liu, C. Luo and C. Wang, *Nanoscale*, 2013, **5**, 780-787.
